# Supplementary material for: Clinical characteristics and prognostic significance of TCGA and ACRG classification in gastric cancer among the Chinese population
Source: PubMed Central journal article supplement — Mol Med Rep. 2020 May 22;22(2):828–40. doi: 10.3892/mmr.2020.11183 (PMC7346591; doi:10.3892/mmr.2020.11183), 2020-05-22
Supplement: Supplementary_Data.pdf [file Supplementary_Data.pdf]

Figure S1. Examples of the full range of weak, moderate and strong staining. (A) weak staining, (B) moderate staining and (C) strong staining. MLH1, MutL protein homolog 1; MDM2, mouse double minute 2 homolog; P21, cyclin-dependent kinase inhibitor 1A.

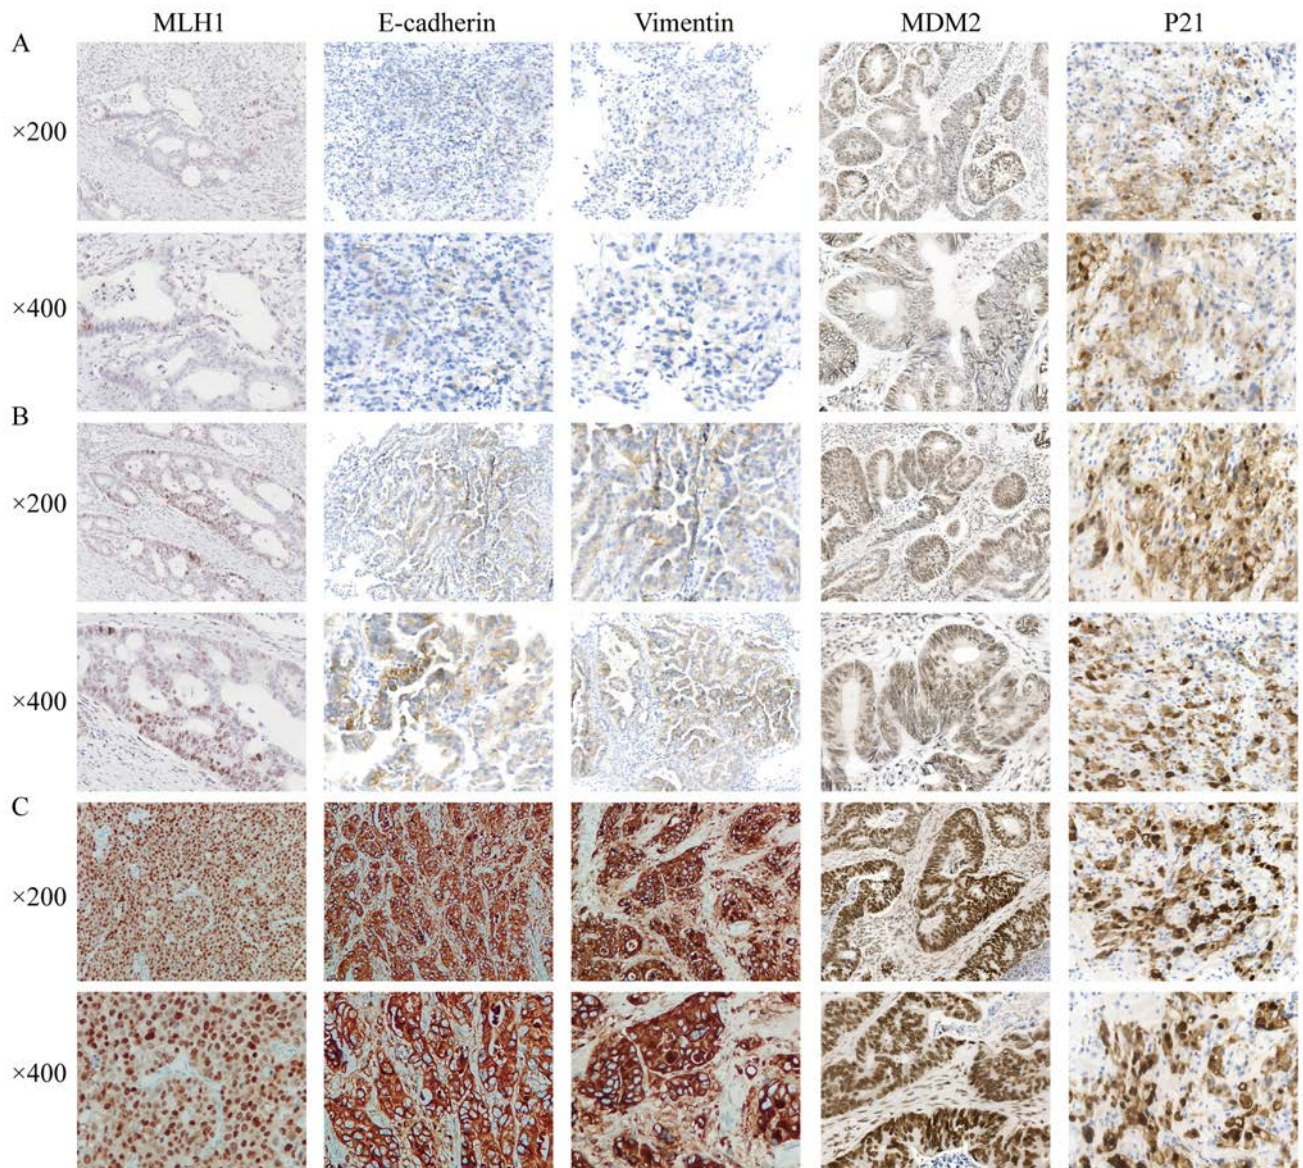

Table S1. The Cancer Genome Atlas molecular subtypes and mutated and amplified genes.

| Abnormal genes       | n  | EBV <sup>+</sup> , n (%) | MSI, n (%) | GS, n (%) | CIN, n (%) |
|----------------------|----|--------------------------|------------|-----------|------------|
| <b>Mutation</b>      |    |                          |            |           |            |
| <i>TP53</i>          | 52 | 0 (0)                    | 11 (21.2)  | 11 (21.2) | 30 (57.7)  |
| <i>APC</i>           | 18 | 2 (11.1)                 | 2 (11.1)   | 2 (11.1)  | 12 (66.7)  |
| <i>ARID1A</i>        | 14 | 1 (7.1)                  | 1 (7.1)    | 9 (64.3)  | 3 (21.4)   |
| <i>PLK3CA</i>        | 11 | 5 (45.5)                 | 2 (18.2)   | 2 (18.2)  | 2 (18.2)   |
| <i>ERBB3</i>         | 9  | 0 (0)                    | 3 (33.3)   | 2 (22.2)  | 4 (44.4)   |
| <b>Amplification</b> |    |                          |            |           |            |
| <i>CCNE1</i>         | 13 | 1 (7.7)                  | 0 (0)      | 2 (15.4)  | 10 (76.9)  |
| <i>MYC</i>           | 7  | 0 (0)                    | 0 (0)      | 6 (85.7)  | 1 (14.3)   |
| <i>CDK6</i>          | 4  | 0 (0)                    | 0 (0)      | 1 (25)    | 3 (75)     |
| <i>EGFR</i>          | 4  | 0 (0)                    | 0 (0)      | 0 (0)     | 4 (100.0)  |
| <i>KRAS</i>          | 2  | 0 (0)                    | 0 (0)      | 1 (50.0)  | 1 (50.0)   |

EBV, Epstein-Barr virus; MSI, microsatellite instability; GS, gene stable; CIN, chromosome instability.
